# Supplementary material
Source: publisher figshare collection journal article supplement (https://acs.figshare.com/ndownloader/files/20098364)
Supplement: Supplementary file 1 [file 20098364]

Compound No	Smile	PAM Fold Activation @ 1 �M
23	CC1=C(C2=CC=C(OC)C=C2)SC(C(CC)=O)=C1C3=CC=C(S(=O)(N)=O)C=C3	22
24	CC1=C(C2=CC=CC=C2)SC(C(CC)=O)=C1C3=CC=C(S(=O)(N)=O)C=C3	2.4
25	CC1=C(C2=CC=C(C(F)(F)F)C=C2)SC(C(CC)=O)=C1C3=CC=C(S(=O)(N)=O)C=C3	15.3
26	CC1=C(C2=CC=C(OCC)C=C2)SC(C(CC)=O)=C1C3=CC=C(S(=O)(N)=O)C=C3	6
27	CC1=C(C2=CC=C(F)C=C2)SC(C(CC)=O)=C1C3=CC=C(S(=O)(N)=O)C=C3	8.7
28	CC1=C(C2=CC=C(Cl)C=C2)SC(C(CC)=O)=C1C3=CC=C(S(=O)(N)=O)C=C3	22
29	CC1=C(C2=C(Cl)C=CC=C2)SC(C(CC)=O)=C1C3=CC=C(S(=O)(N)=O)C=C3	1
30	CC1=C(C2=CC(Cl)=CC=C2)SC(C(CC)=O)=C1C3=CC=C(S(=O)(N)=O)C=C3	1
31	CC1=C(C2=CC=C(C3CC3)C=C2)SC(C(CC)=O)=C1C4=CC=C(S(=O)(N)=O)C=C4	7
32	CC1=C(C2=CC=C(C(C)(C)C)C=C2)SC(C(CC)=O)=C1C3=CC=C(S(=O)(N)=O)C=C3	1
33	CC1=C(C2=CC=C(N(C)C)C=C2)SC(C(CC)=O)=C1C3=CC=C(S(=O)(N)=O)C=C3	19
34	CC1=C(C2=CC=NC=C2)SC(C(CC)=O)=C1C3=CC=C(S(=O)(N)=O)C=C3	1
35	CC1=C(C2=COC=C2)SC(C(CC)=O)=C1C3=CC=C(S(=O)(N)=O)C=C3	1
36	CC1=C(C2=C(Cl)C=C(Cl)C=C2)SC(C(CC)=O)=C1C3=CC=C(S(=O)(N)=O)C=C3	12
37	CC1=C(C2=CC=C(Cl)C=C2)SC(C(C)=O)=C1C3=CC=C(S(=O)(N)=O)C=C3	7
38	CC1=C(C2=CC=C(Cl)C=C2)SC(C(N(C)C)=O)=C1C3=CC=C(S(=O)(N)=O)C=C3	1
39	CC1=C(C2=CC=C(Cl)C=C2)SC(C(N(CCO)CCC)=O)=C1C3=CC=C(S(=O)(N)=O)C=C3	1
40	CC1=C(C2=CC=C(Cl)C=C2)SC(C(N3CCCCC3)=O)=C1C4=CC=C(S(=O)(N)=O)C=C4	1
